# Supplementary material for: Metastasis-associated miR-23a from nasopharyngeal carcinoma-derived exosomes mediates angiogenesis by repressing a novel target gene TSGA10
Source: PubMed Central journal article supplement (PMC5966363; doi:10.1038/s41388-018-0183-6), 2018-03-09
Supplement: 41388_2018_183_MOESM1_ESM.pdf [file 41388_2018_183_MOESM1_ESM.pdf]

## Supplementary

**Table S1. Clinical information of patients in the NPC study, related to Figure 1.**

| Patient | Stage | Yr. DX. | Age DX. | Gender DX. | Progression (No: 1; pre-metastasis: 2; metastasis: 3) |
|---------|-------|---------|---------|------------|-------------------------------------------------------|
| 1       | 3     | 2006.06 | 18      | M          | 2                                                     |
| 2       | 3     | 2006.08 | 67      | M          | 1                                                     |
| 3       | 3     | 2006.09 | 48      | M          | 1                                                     |
| 4       | 4     | 2006.09 | 59      | M          | 2                                                     |
| 5       | 2     | 2006.10 | 44      | M          | 1                                                     |
| 6       | 4     | 2006.10 | 71      | M          | 1                                                     |
| 7       | 2     | 2006.10 | 57      | M          | 1                                                     |
| 8       | 1     | 2006.10 | 52      | F          | 1                                                     |
| 9       | 3     | 2006.10 | 30      | M          | 1                                                     |
| 10      | 2     | 2006.11 | 45      | F          | 1                                                     |
| 11      | 4     | 2006.11 | 48      | M          | 2                                                     |
| 12      | 3     | 2006.12 | 65      | M          | 2                                                     |
| 13      | 2     | 2006.12 | 34      | M          | 1                                                     |
| 14      | 2     | 2006.12 | 33      | F          | 1                                                     |
| 15      | 4     | 2006.12 | 25      | M          | 1                                                     |
| 16      | 2     | 2006.12 | 45      | M          | 2                                                     |
| 17      | 2     | 2006.12 | 38      | M          | 1                                                     |
| 18      | 2     | 2007.01 | 39      | F          | 1                                                     |
| 19      | 2     | 2007.01 | 57      | M          | 1                                                     |
| 20      | 4     | 2007.02 | 41      | F          | 1                                                     |
| 21      | 2     | 2007.02 | 75      | M          | 1                                                     |
| 22      | 4     | 2007.03 | 50      | M          | 1                                                     |
| 23      | 3     | 2007.03 | 30      | F          | 2                                                     |
| 24      | 3     | 2007.03 | 46      | M          | 1                                                     |
| 25      | 3     | 2007.03 | 49      | M          | 2                                                     |
| 26      | 2     | 2007.03 | 43      | F          | 1                                                     |
| 27      | 4     | 2007.03 | 38      | M          | 1                                                     |
| 28      | 2     | 2007.03 | 46      | M          | 1                                                     |
| 29      | 1     | 2007.03 | 32      | F          | 1                                                     |
| 30      | 2     | 2007.04 | 71      | M          | 1                                                     |
| 31      | 2     | 2007.04 | 70      | M          | 1                                                     |
| 32      | 2     | 2007.05 | 34      | M          | 1                                                     |
| 33      | 2     | 2007.05 | 39      | M          | 1                                                     |
| 34      | 3     | 2007.05 | 51      | M          | 2                                                     |
| 35      | 3     | 2007.05 | 72      | M          | 2                                                     |
| 36      | 3     | 2007.06 | 39      | M          | 1                                                     |

|    |   |         |    |   |   |
|----|---|---------|----|---|---|
| 37 | 2 | 2007.05 | 46 | M | 1 |
| 38 | 3 | 2007.05 | 53 | F | 1 |
| 39 | 2 | 2007.05 | 39 | F | 2 |
| 40 | 3 | 2007.06 | 38 | M | 1 |
| 41 | 4 | 2007.06 | 50 | M | 1 |
| 42 | 4 | 2007.07 | 45 | M | 2 |
| 43 | 2 | 2007.07 | 40 | M | 1 |
| 44 | 2 | 2007.07 | 43 | M | 1 |
| 45 | 2 | 2007.07 | 65 | M | 2 |
| 46 | 3 | 2007.07 | 38 | F | 1 |
| 47 | 2 | 2007.08 | 38 | M | 1 |
| 48 | 2 | 2007.08 | 51 | F | 1 |
| 49 | 4 | 2007.08 | 62 | M | 1 |
| 50 | 2 | 2007.09 | 51 | F | 1 |
| 51 | 2 | 2007.09 | 69 | M | 1 |
| 52 | 3 | 2008.03 | 44 | M | 1 |
| 53 | 4 | 2007.09 | 52 | M | 2 |
| 54 | 2 | 2007.09 | 35 | F | 1 |
| 55 | 4 | 2007.10 | 46 | F | 1 |
| 56 | 1 | 2007.10 | 33 | M | 1 |
| 57 | 2 | 2007.10 | 52 | F | 1 |
| 58 | 2 | 2007.10 | 52 | M | 2 |
| 59 | 3 | 2007.10 | 42 | M | 1 |
| 60 | 4 | 2007.10 | 41 | M | 1 |
| 61 | 2 | 2007.11 | 53 | M | 2 |
| 62 | 2 | 2007.11 | 35 | F | 1 |
| 63 | 4 | 2007.11 | 51 | M | 1 |
| 64 | 3 | 2007.12 | 52 | F | 1 |
| 65 | 4 | 2007.11 | 50 | M | 1 |
| 66 | 2 | 2007.11 | 44 | F | 1 |
| 67 | 4 | 2007.11 | 48 | M | 2 |
| 68 | 4 | 2007.11 | 38 | M | 3 |
| 69 | 2 | 2007.11 | 54 | M | 1 |
| 70 | 2 | 2007.12 | 43 | M | 1 |
| 71 | 4 | 2007.12 | 49 | M | 1 |
| 72 | 3 | 2007.12 | 35 | F | 1 |
| 73 | 4 | 2007.12 | 60 | M | 1 |
| 74 | 3 | 2008.01 | 52 | M | 1 |
| 75 | 3 | 2008.01 | 26 | M | 1 |
| 76 | 4 | 2008.01 | 51 | M | 2 |
| 77 | 3 | 2008.01 | 51 | F | 1 |
| 78 | 2 | 2008.01 | 75 | M | 1 |
| 79 | 2 | 2008.02 | 60 | M | 1 |

|     |   |         |    |   |   |
|-----|---|---------|----|---|---|
| 80  | 2 | 2008.01 | 42 | F | 1 |
| 81  | 1 | 2008.01 | 42 | M | 1 |
| 82  | 4 | 2008.02 | 22 | M | 2 |
| 83  | 4 | 2008.02 | 55 | M | 1 |
| 84  | 2 | 2008.02 | 45 | M | 1 |
| 85  | 2 | 2008.02 | 48 | M | 1 |
| 86  | 4 | 2008.02 | 58 | M | 1 |
| 87  | 3 | 2008.02 | 30 | M | 2 |
| 88  | 2 | 2008.02 | 57 | M | 1 |
| 89  | 4 | 2008.02 | 28 | M | 1 |
| 90  | 4 | 2008.03 | 57 | M | 2 |
| 91  | 4 | 2008.03 | 59 | M | 1 |
| 92  | 4 | 2008.03 | 66 | M | 3 |
| 93  | 3 | 2008.03 | 66 | M | 1 |
| 94  | 4 | 2008.03 | 41 | M | 1 |
| 95  | 2 | 2008.03 | 46 | F | 1 |
| 96  | 2 | 2008.03 | 45 | M | 2 |
| 97  | 3 | 2008.03 | 53 | M | 1 |
| 98  | 2 | 2008.03 | 68 | F | 1 |
| 99  | 4 | 2008.04 | 71 | M | 2 |
| 100 | 2 | 2008.04 | 45 | F | 1 |
| 101 | 4 | 2008.04 | 36 | M | 3 |
| 102 | 4 | 2008.04 | 55 | F | 3 |
| 103 | 3 | 2008.04 | 36 | M | 1 |
| 104 | 3 | 2008.04 | 23 | M | 1 |
| 105 | 3 | 2008.05 | 60 | M | 1 |
| 106 | 2 | 2008.05 | 46 | F | 1 |
| 107 | 2 | 2008.05 | 43 | M | 1 |
| 108 | 3 | 2008.05 | 52 | M | 1 |
| 109 | 2 | 2008.05 | 36 | F | 1 |
| 110 | 2 | 2008.05 | 67 | M | 1 |
| 111 | 4 | 2008.05 | 57 | M | 1 |
| 112 | 3 | 2008.06 | 35 | M | 1 |
| 113 | 4 | 2008.06 | 48 | M | 1 |
| 114 | 2 | 2008.06 | 45 | F | 1 |
| 115 | 3 | 2008.06 | 43 | F | 1 |
| 116 | 2 | 2008.06 | 61 | M | 1 |
| 117 | 2 | 2008.06 | 54 | M | 1 |
| 118 | 3 | 2008.06 | 51 | M | 1 |
| 119 | 4 | 2008.06 | 34 | F | 1 |
| 120 | 2 | 2008.06 | 65 | M | 1 |
| 121 | 4 | 2008.05 | 57 | M | 1 |
| 122 | 3 | 2008.06 | 77 | M | 1 |

|     |   |         |    |   |   |
|-----|---|---------|----|---|---|
| 123 | 4 | 2008.06 | 50 | M | 1 |
| 124 | 2 | 2008.06 | 52 | M | 2 |
| 125 | 4 | 2008.06 | 60 | M | 1 |
| 126 | 3 | 2008.06 | 56 | M | 2 |
| 127 | 1 | 2008.06 | 52 | M | 1 |
| 128 | 1 | 2008.06 | 60 | M | 1 |
| 129 | 4 | 2008.06 | 36 | M | 1 |
| 130 | 2 | 2008.07 | 52 | M | 2 |
| 131 | 3 | 2008.07 | 38 | F | 1 |
| 132 | 2 | 2008.08 | 76 | M | 1 |
| 133 | 1 | 2008.08 | 52 | M | 1 |
| 134 | 4 | 2008.07 | 58 | M | 2 |
| 135 | 3 | 2008.07 | 38 | F | 1 |
| 136 | 3 | 2008.08 | 62 | M | 2 |
| 137 | 2 | 2008.08 | 43 | M | 1 |
| 138 | 2 | 2008.08 | 38 | F | 1 |
| 139 | 2 | 2008.08 | 55 | F | 1 |
| 140 | 3 | 2008.08 | 38 | M | 1 |
| 141 | 2 | 2008.08 | 38 | F | 1 |
| 142 | 4 | 2008.08 | 66 | M | 1 |
| 143 | 2 | 2008.09 | 30 | F | 1 |
| 144 | 4 | 2008.09 | 61 | M | 3 |
| 145 | 3 | 2008.10 | 35 | F | 1 |
| 146 | 2 | 2008.10 | 42 | M | 1 |
| 147 | 4 | 2008.10 | 41 | F | 1 |
| 148 | 3 | 2008.10 | 41 | M | 1 |
| 149 | 1 | 2008.10 | 26 | M | 1 |
| 150 | 4 | 2008.10 | 23 | F | 1 |

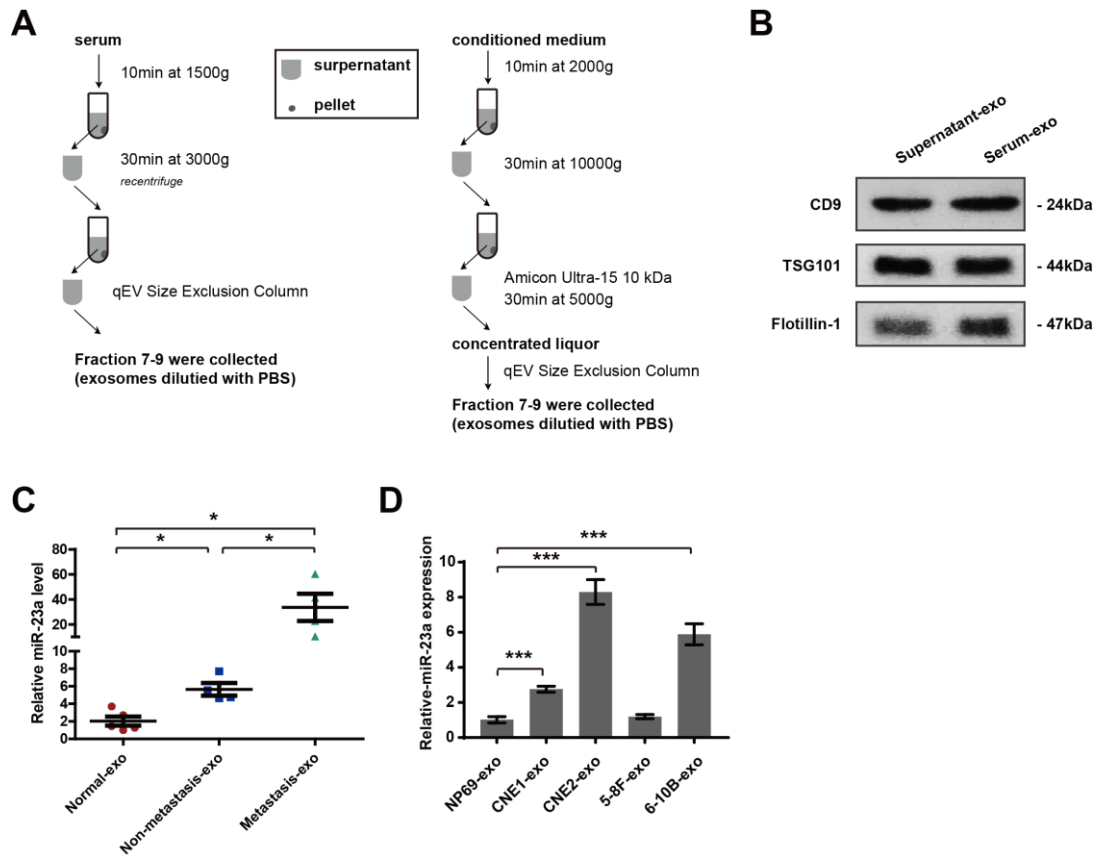

**Supplementary Figure S1: MiR-23a is highly expressed in NPC-exo by qEV Size Exclusion Columns.** (a) Scheme exosomes isolation by qEV. (b) Western blot analysis of exosomal markers. Flotillin-1 was used as a loading control. (c-d) qRT-PCR of miRNA level in NPC-exosomes. Student's t-test.

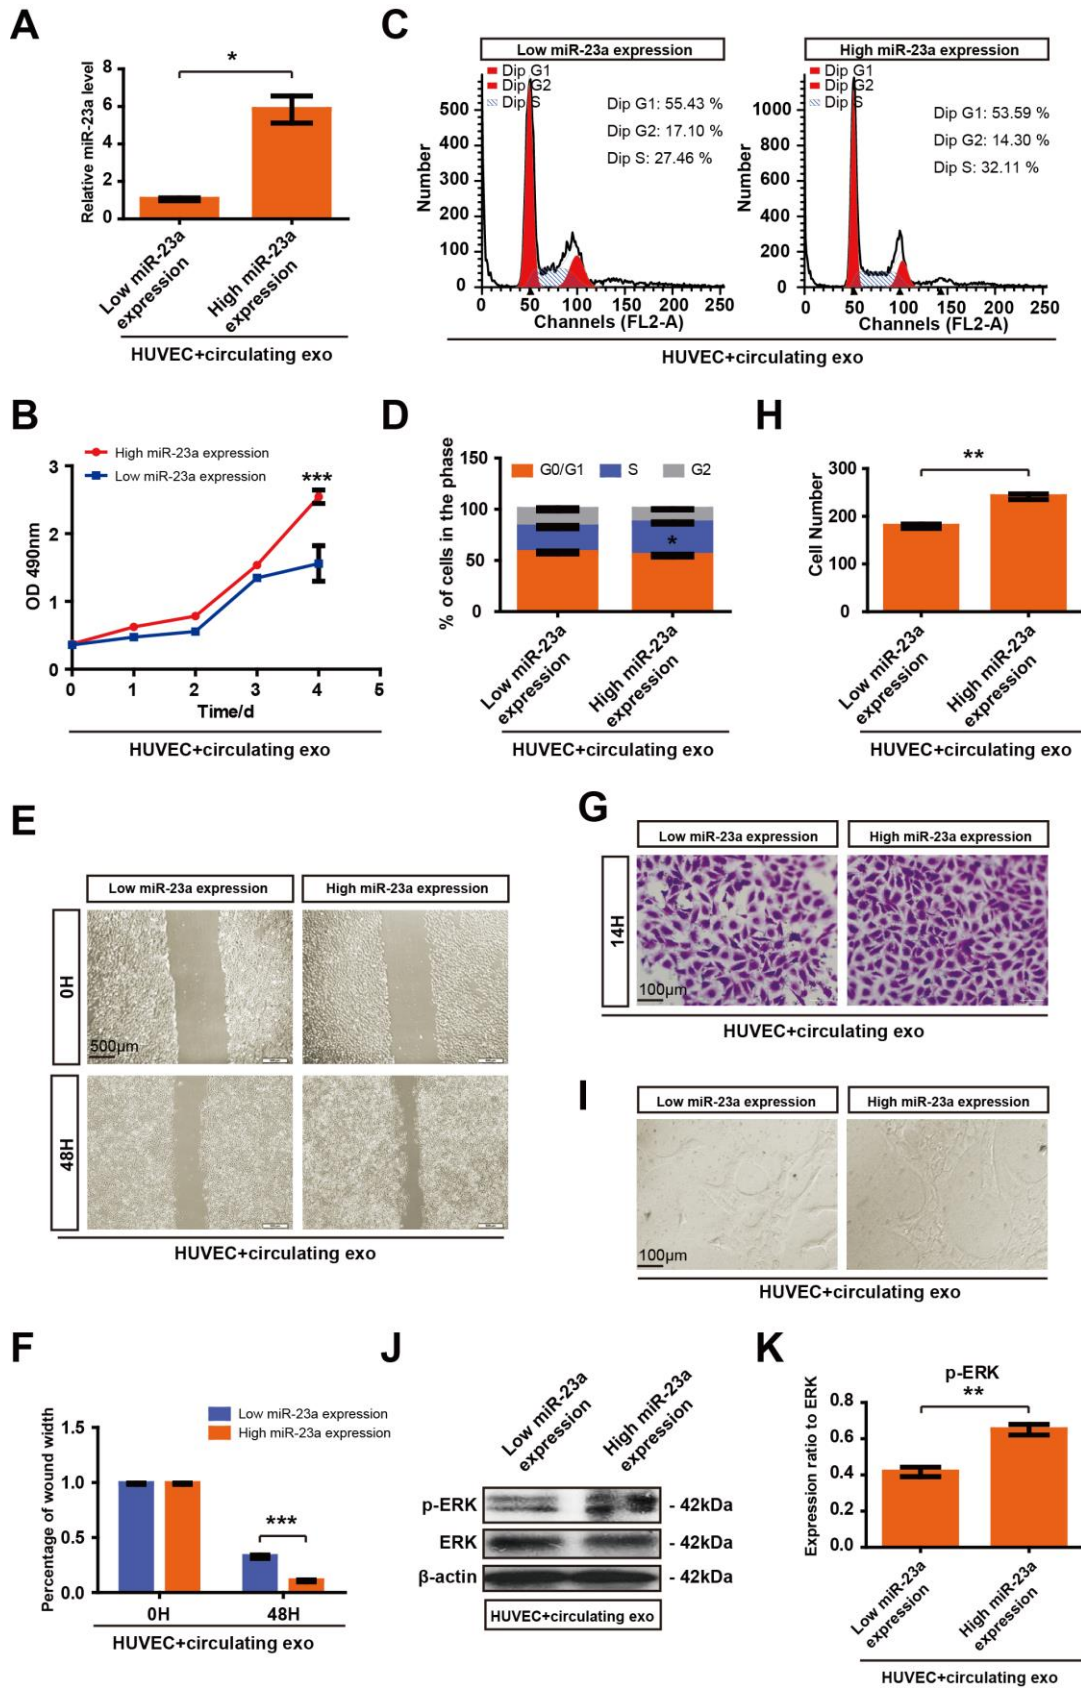

Supplementary Figure S2: Circulating exosomes contain miR-23a modulates *in vitro* angiogenesis.

(a) 48h after treated with circulating exosomes, miR-23a levels of HUVECs were measured by

qRT-PCR. t test. (b) Viabilities of HUVECs treated with circulating exosomes were measured by the CCK8 assay. Two-way ANOVA. (c-d) Flow cytometry analysis of the cell cycle were performed 48h after treated with circulating exosomes. t test. (e-f) Wound healing assay showed migration of HUVECs treated with various exosomes. Two-way ANOVA. (g-h) Transwell migration assays were performed to measure cell migration. t test. (i) Tube formation assays using HUVECs supplemented with exosomes were conducted using Matrigel. (j-k) Western blot of p-ERK in HUVECs incubation with circulating exosomes. t test.

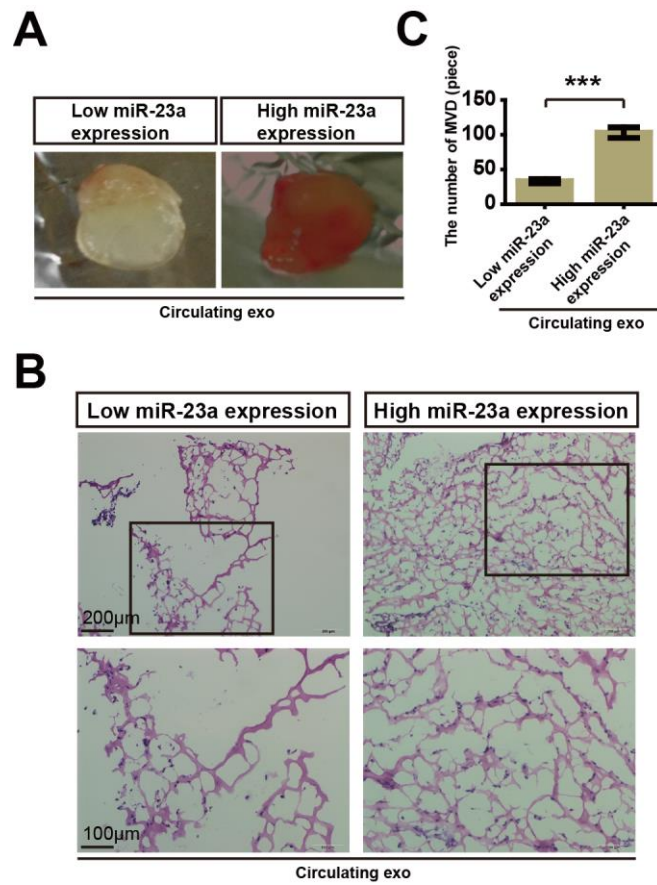

**Supplementary Figure S3: Circulating exosomes contain miR-23a modulates *in vivo* angiogenesis.**

(a) Gross observation, circulating exosomes modulated angiogenesis. (b) Representative micrographs of hematoxylin and eosin staining of Matrigel. (c) Quantitative evaluation of angiogenesis. Student's t-test.



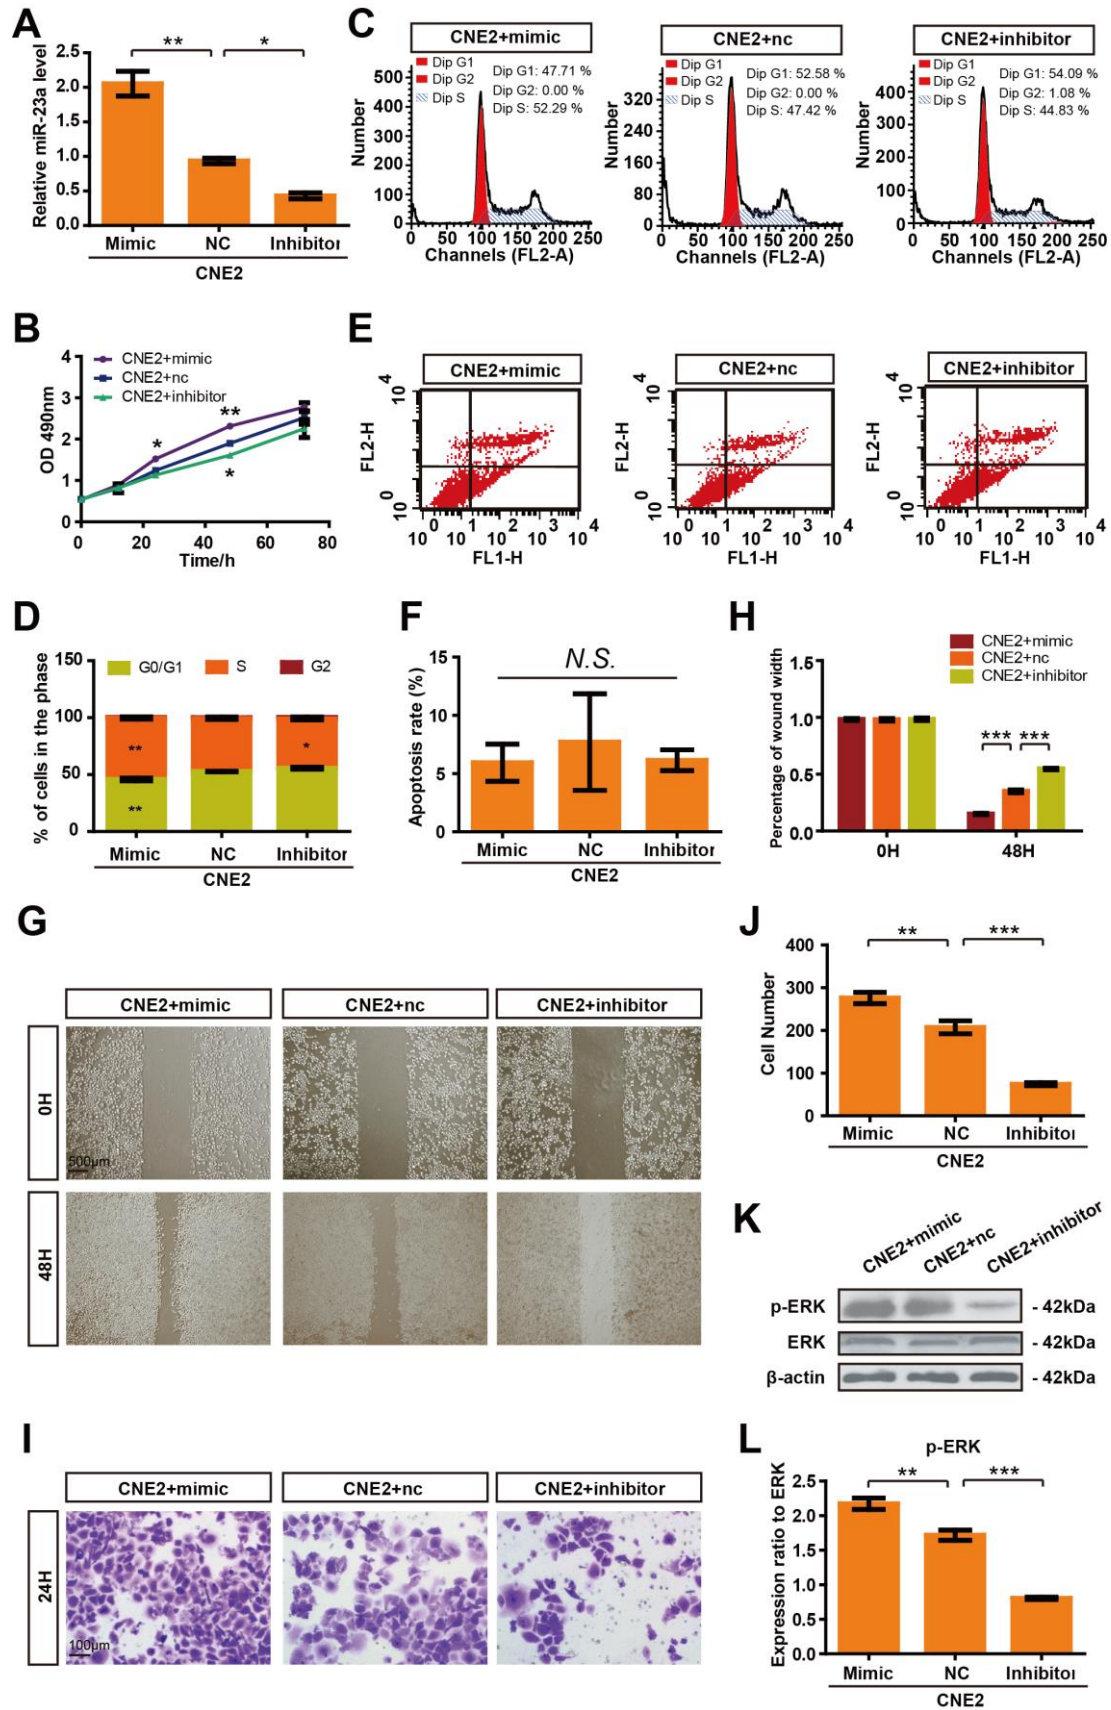

**Supplementary Figure S4: MiR-23a enhanced CNE2 cell proliferation and migration.** (a) Transfection efficiency were measured by qRT-PCR. One-way ANOVA. (b) The cell growth of

transfected CNE2 cells was measured by CCK8 assay. Two-way ANOVA. (c-d) Flow cytometry analysis of the cell cycle were performed at 36 after transfection. One-way ANOVA. (e-f) Apoptosis rates were measured by FCM analysis after Annexin V/PI staining. One-way ANOVA. (g-h) Wound healing assay showed cell migration in transfected CNE2 cells. Two-way ANOVA. (i-j) Transwell migration assays were performed to measure cell migration. One-way ANOVA. (k-l) images of p-ERK expression in transfected cells. One-way ANOVA.

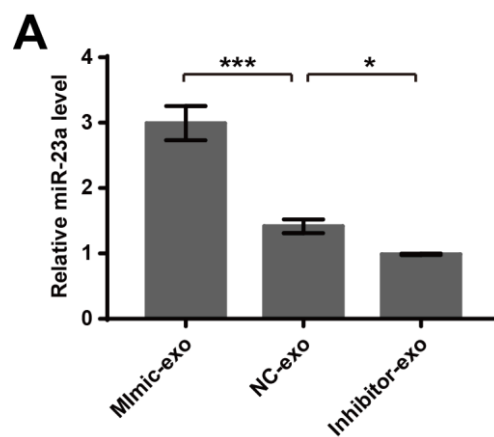

**Supplementary Figure S5: Exosomal miR-23a expression predominantly changed in miR-23a-treated cells by qEV Size Exclusion Columns.** (a) qRT-PCR of miRNA expression in exosomes isolated from HUVECs treated as indicated. One-way ANOVA.

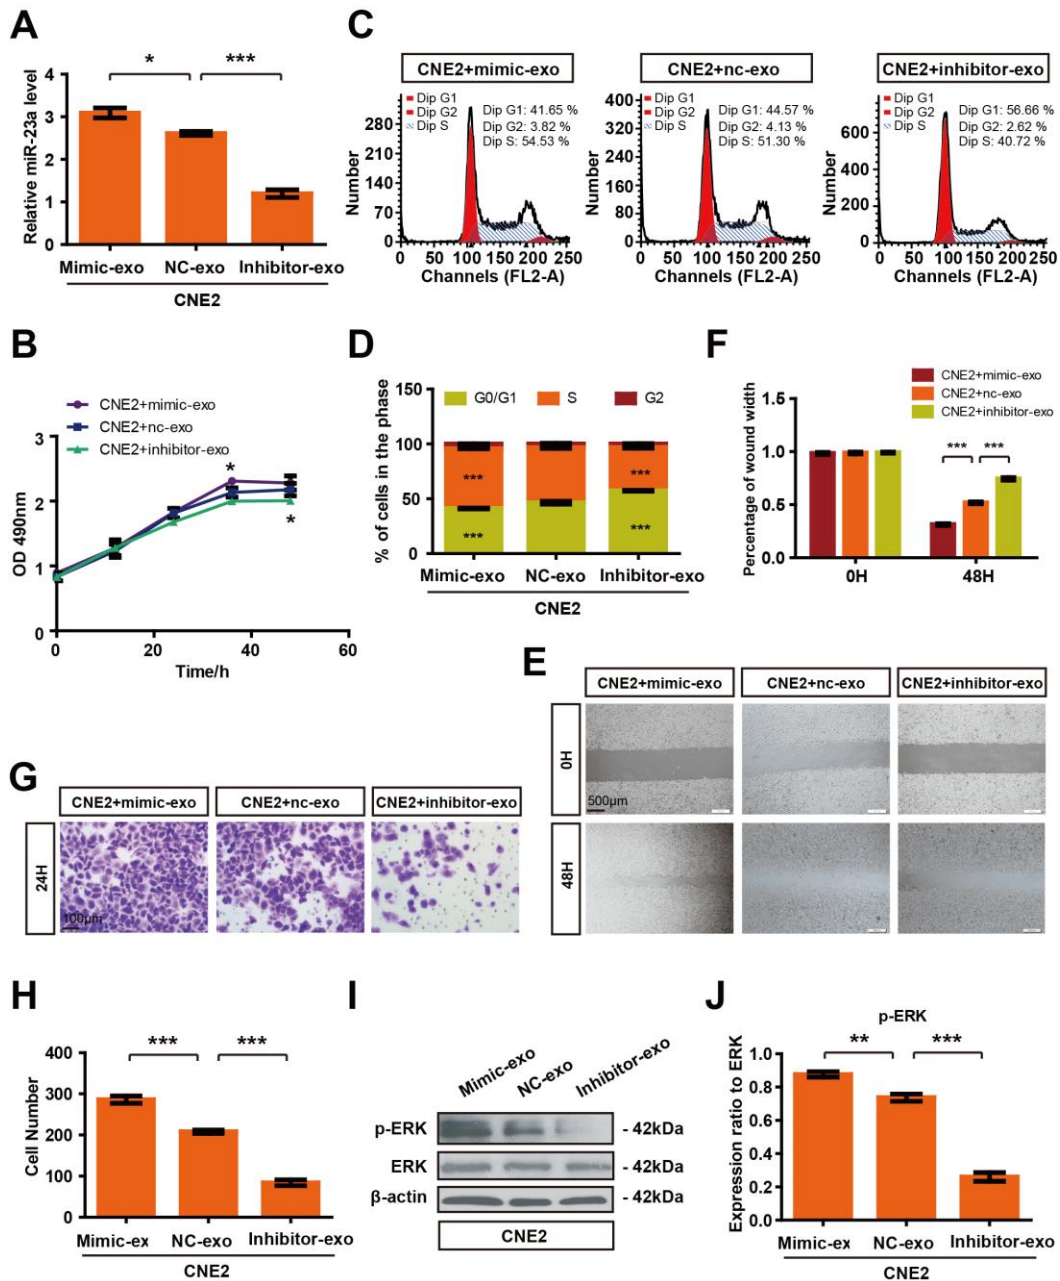

**Supplementary Figure S6: High exosomal miR-23a promoted CNE2 cell proliferation and migration.** (a) 48h after treated with exosomes isolated from culture medium of transfected CNE-2 cells, miR-23a levels of CNE2 were measured by qRT-PCR. One-way ANOVA. (b) Viabilities of CNE2 cells treated with various exosomes were measured by the CCK8 assay. Two-way ANOVA. (c-d) Flow cytometry analysis of the cell cycle were performed 48h after treated with exosomes. One-way ANOVA. (e-f) Wound healing assay showed migration of CNE2 cells treated with various exosomes. Two-way ANOVA. (g-h) Transwell migration assays were performed to measure cell migration. One-way ANOVA. (i-j) Western blot of p-ERK in CNE2 cells incubation with exosomes. One-way ANOVA.

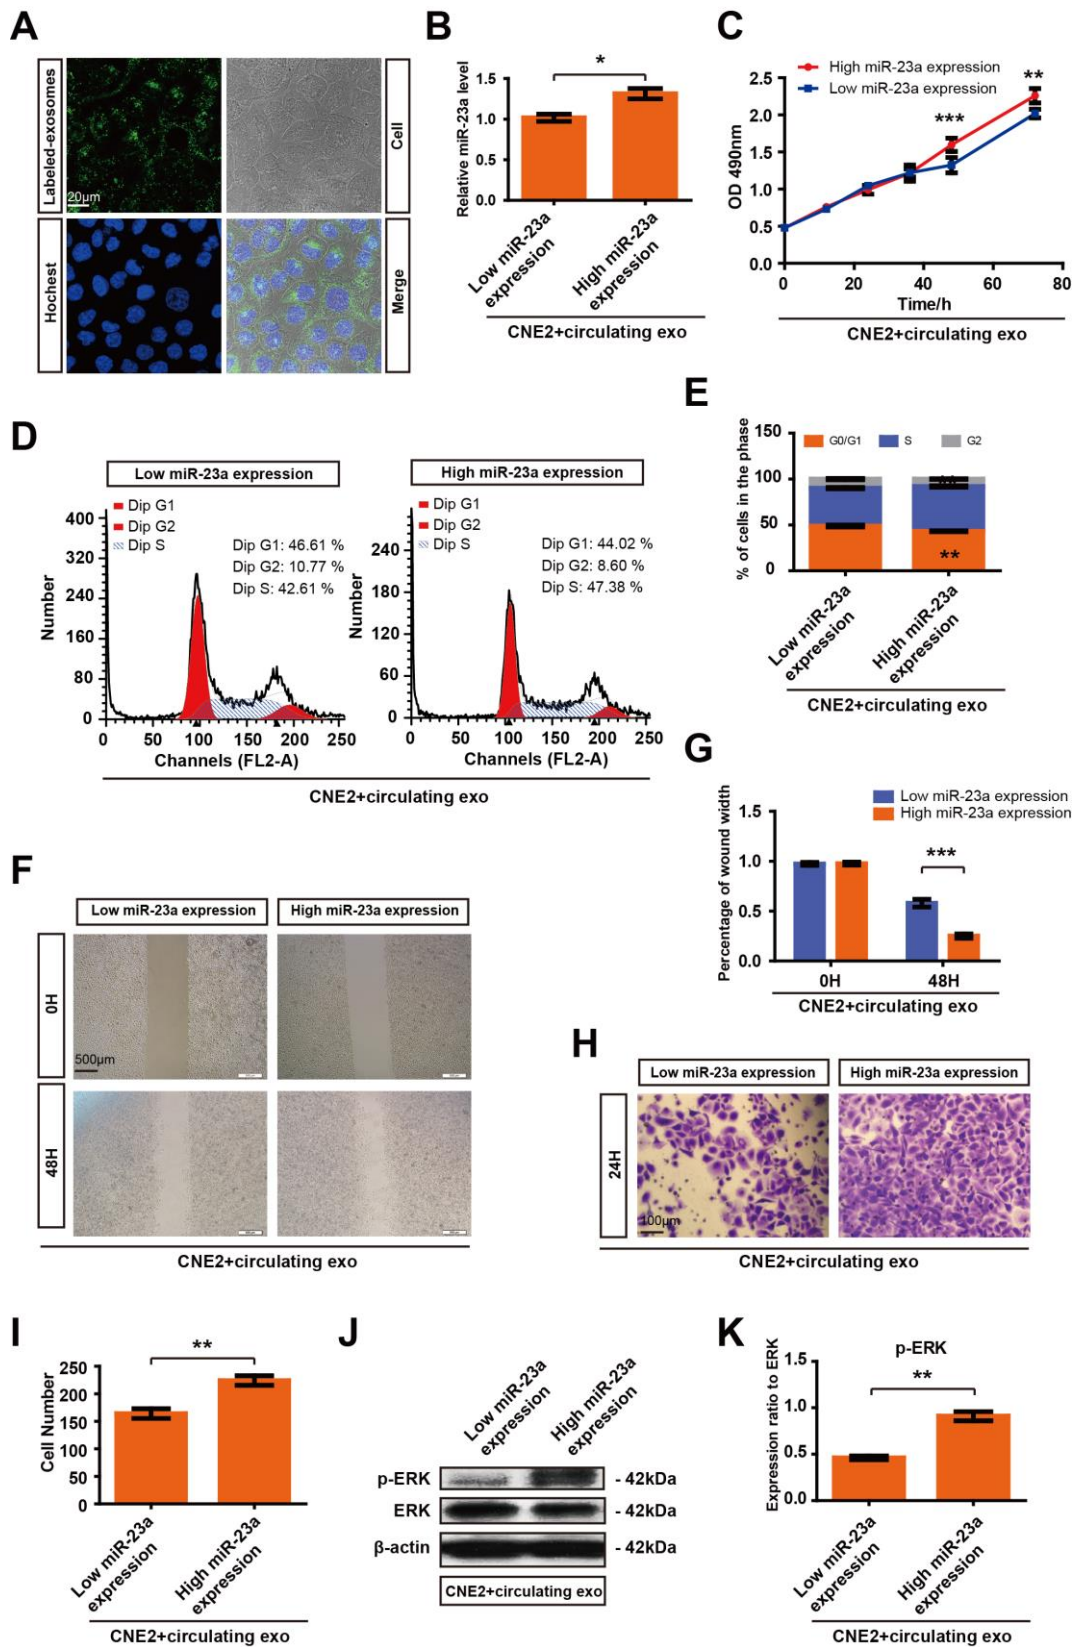

**Supplementary Figure S7: Circulating exosomes contain miR-23a modulates proliferation and migration of NPC cells.** (a) Uptake of exosomes in CNE2 cells by confocal microscopy. Blue: Hoechst staining; Green: PKH67-labeled exosomes. (b) 48h after treated with circulating exosomes,

miR-23a levels of CNE2 cells were measured by qRT-PCR. t test. (c) Viabilities of CNE2 cells treated with circulating exosomes were measured by the CCK8 assay. Two-way ANOVA. (d-e) Flow cytometry analysis of the cell cycle were performed 48h after treated with circulating exosomes. t test. (f-g) Wound healing assay showed migration level of CNE2 cells treated with various exosomes. Two-way ANOVA. (h-i) Transwell migration assays were performed to measure cell migration. t test. (j-k) Western blot of p-ERK in CNE2 cells incubation with circulating exosomes. t test.

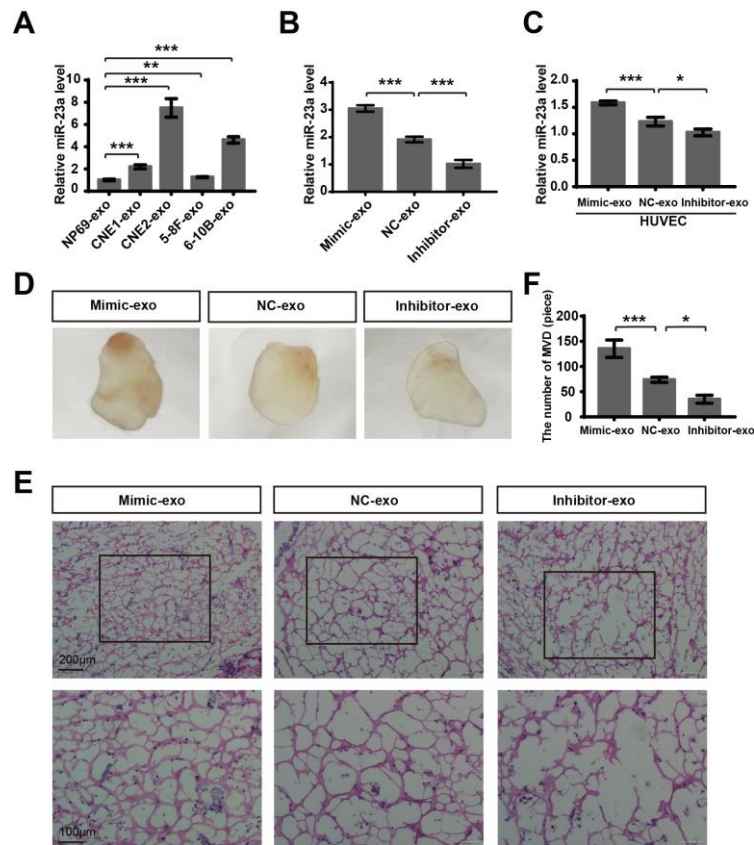

**Supplementary Figure S8: High exosomal miR-23a promoted angiogenesis using exosomes isolated from cellular media supplemented with exosome-free serum (SBI SystemBiosciences).** (a) qRT-PCR of miRNA level in exosomes isolated from NPC cells. t-test. (b) qRT-PCR of miRNA expression in exosomes isolated from miR-23a-treated-CM. One-way ANOVA. (c) 48h after treated with exosomes isolated from culture medium of transfected CNE-2 cells., miR-23a levels of HUVECs were measured by qRT-PCR. One-way ANOVA. (d) Gross observation, exosomes modulated angiogenesis. (e) Representative micrographs of hematoxylin and eosin staining of Matrigel. (f) Quantitative evaluation of angiogenesis. One-way ANOVA.
